# Supplementary material for: Aggressive breast cancer in western Kenya has early onset, high proliferation, and immune cell infiltration
Source: Springer Nature journal article supplement (doi:10.1186/s12885-016-2204-6), 2016-03-10
Supplement: MOESM1 [file 9746186]

| <b>Table S1. Antibodies used in this study</b> |                                                                                               |                  |                         |                |                  |                  |                        |
|------------------------------------------------|-----------------------------------------------------------------------------------------------|------------------|-------------------------|----------------|------------------|------------------|------------------------|
| <b>Antibody name</b>                           | <b>Antigen</b>                                                                                | <b>Ab source</b> | <b>Positive control</b> | <b>Company</b> | <b>Catalog #</b> | <b>Dilution*</b> | <b>Special Methods</b> |
| HER2                                           | Her2 protein                                                                                  | rabbit           | breast                  | sk001          | 90456            | RTU              |                        |
| ER alpha                                       | Estrogen receptor                                                                             | rabbit           | breast                  | IR084 DAKO     | 10075784         | RTU              |                        |
| PR                                             | Progesterone receptor                                                                         | mouse            | breast                  | IR068 DAKO     | 10075666         | RTU              |                        |
| Ki67                                           | Expressed during all active phases of cell cycle but absent in resting cells                  | mouse            | tonsil                  | IR626 DAKO     | 93901            | RTU              |                        |
| CD68                                           | Macrophages                                                                                   | mouse            | tonsil                  | IR609 DAKO     | 85199            | RTU              |                        |
| CD163                                          | M2 macrophages                                                                                | mouse            | bone marrow             | VP-C374        | 6017007          | 1/100            |                        |
| CD4                                            | Thymocytes, T helper cells, and peripheral T cells                                            | mouse            | tonsil                  | IR649 DAKO     | 86211            | RTU              | no H202                |
| CD8                                            | Cytotoxic/suppressor T cells                                                                  | mouse            | tonsil                  | IR623 DAKO     | 87824            | RTU              |                        |
| CD20                                           | B cells                                                                                       | mouse            | tonsil                  | IR604 DAKO     | 92175            | RTU              |                        |
| CD25                                           | Regulatory T cells. Type 1 transmembrane protein on activated B, T cells and some thymocytes. | mouse            | tonsil                  | SK200 DAKO     | 10067590         | RTU              |                        |

\*RTU=ready to use
