# Supplementary material for: Aggressive breast cancer in western Kenya has early onset, high proliferation, and immune cell infiltration
Source: Springer Nature journal article supplement (doi:10.1186/s12885-016-2204-6), 2016-03-10
Supplement: MOESM2 [file 9746186]

**Table S2. Comparison of gender rates in breast cancer patients of Eldoret, Kenya and other regions.**

| Country       | Males (N) | Males (%) | Females (N) | Females (%) | Total (N) | P value, compared to current study | References                      |
|---------------|-----------|-----------|-------------|-------------|-----------|------------------------------------|---------------------------------|
| Kenya         | 4         | 7         | 54          | 93          | 58        |                                    | This study                      |
| Kenya         | 4         | 3         | 125         | 97          | 129       | 0.2086                             | Bird <i>et al.</i> <sup>a</sup> |
| Uganda        | 2         | 4         | 45          | 96          | 47        | 0.444                              | Roy <i>et al.</i> <sup>b</sup>  |
| Nigeria       | 7         | 9         | 72          | 91          | 79        | 0.7662                             | Ogundiran <i>et al.</i>         |
| Zimbabwe      | 2         | 2         | 124         | 98          | 126       | 0.0798                             | Chokunonga <i>et al.</i>        |
| Tunisia       | 29        | 2         | 1408        | 98          | 1437      | <b>0.036</b>                       | Maalej <i>et al.</i>            |
| Nigeria       | 26        | 2         | 1287        | 98          | 1313      | <b>0.0347</b>                      | Ezeome <i>et al.</i>            |
| United States | 2350      | 1         | 231,840     | 99          | 234190    | <b>0.0028*</b>                     | Siegel <i>et al.</i>            |

\*In contrast to our current study, an analysis comparing two East African populations (Bird *et al.*; Roy *et al.*) to Siegel *et al.* suggests that neither patient population differs as significantly from Siegel (P-values compared to Siegel are 0.081<sup>a</sup> and 0.041<sup>b</sup>, respectively).
